# Supplementary material for: Concurrent validity of a patient self-administered examination and a clinical examination for femoroacetabular impingement syndrome
Source: PubMed Central journal article supplement — BMJ Open Sport Exerc Med. 2019 Oct 10;5(1):e000574. doi: 10.1136/bmjsem-2019-000574 (PMC6797256; doi:10.1136/bmjsem-2019-000574), 2019-10-10
Supplement: bmjsem-2019-000574supp001.pdf [file bmjsem-2019-000574supp001.pdf]

| Examination                                    | SN/SP<br>(95% CI)                                                     | +LR/-LR                                                               | PPV/NPV                                                           | For any particular<br>(+) test result, the<br>probability that the<br>disease exists | For any particular<br>(-) test result, the<br>probability that the<br>disease does not<br>exist | Accuracy                       |
|------------------------------------------------|-----------------------------------------------------------------------|-----------------------------------------------------------------------|-------------------------------------------------------------------|--------------------------------------------------------------------------------------|-------------------------------------------------------------------------------------------------|--------------------------------|
| <b>Standardized Clinical Examination (SCE)</b> |                                                                       |                                                                       |                                                                   |                                                                                      |                                                                                                 |                                |
| <b>Pain with sitting</b>                       | 0.51 (95%<br>CI: 0.37 -<br>0.65)/ 0.52<br>(95% CI:<br>0.33 -<br>0.71) | 1.06 (95%<br>CI: 0.66 -<br>1.68)/ 0.95<br>(95% CI:<br>0.60 -<br>1.49) | 0.65 (95%<br>CI: 0.48 -<br>0.79)/0.38<br>(95% CI: 0.23<br>- 0.54) | Pretest=64%<br>Posttest=65.3%                                                        | Pretest=64%<br>Posttest=62.8%                                                                   | 51.25%<br>(39.81-<br>62.59%)   |
| <b>Pain with passive hip extension</b>         | 0.26 (95%<br>CI: 0.15 -<br>0.40)/ 0.84<br>(95% CI:<br>0.66 -<br>0.95) | 1.64 (95%<br>CI: 0.65 -<br>4.11)/ 0.88<br>(95% CI:<br>0.70 -<br>1.10) | 0.74 (95% CI:<br>0.49 -<br>0.91)/0.40<br>(95% CI: 0.28<br>- 0.53) | Pretest=63%<br>Posttest=73.6%                                                        | Pretest=63%<br>Posttest=60%                                                                     | 47.62%<br>(36.60% -<br>58.81%) |
| <b>FABER</b>                                   | 0.79 (95%<br>CI: 0.66 -<br>0.88)/ 0.34<br>(95% CI:<br>0.18 -<br>0.54) | 1.20 (95%<br>CI: 0.89 -<br>1.61)/ 0.62<br>(95% CI:<br>0.31 -<br>1.26) | 0.70 (95% CI:<br>0.57 - 0.81)/<br>0.45 (95% CI:<br>0.24 - 0.68)   | Pretest=66%<br>Posttest=70%                                                          | Pretest=66%<br>Posttest=54.6%                                                                   | 63.53%<br>(52.38% -<br>73.71%) |
| <b>FABER (Restricted)</b>                      | 0.84 (95%<br>CI: 0.72 -<br>0.92)/ 0.17<br>(95% CI:<br>0.06 -<br>0.36) | 1.01 (95%<br>CI: 0.83 -<br>1.24)/ 0.93<br>(95% CI:<br>0.34 -<br>2.53) | 0.66 (95% CI:<br>0.54 - 0.77)/<br>0.36 (95% CI:<br>0.13 - 0.65)   | Pretest=66%<br>Posttest=66%                                                          | Pretest=66%<br>Posttest=64.3%                                                                   | 61.18%<br>(49.99% -<br>71.56%) |

|                                         |                                                        |                                                        |                                                        |                               |                               |                             |
|-----------------------------------------|--------------------------------------------------------|--------------------------------------------------------|--------------------------------------------------------|-------------------------------|-------------------------------|-----------------------------|
| <b>FABER (Pain)</b>                     | 0.52 (95% CI: 0.38 - 0.65)/ 0.34 (95% CI: 0.18 - 0.54) | 0.79 (95% CI: 0.55 - 1.14)/ 1.40 (95% CI: 0.79 - 2.47) | 0.60 (95% CI: 0.45 - 0.74)/ 0.27 (95% CI: 0.14 - 0.44) | Pretest=66%<br>Posttest=60.5% | Pretest=66%<br>Posttest=73.1% | 45.88%<br>(35.02% - 57.04%) |
| <b>Resisted Hip Abduction</b>           | 0.15 (95% CI: 0.07 - 0.27)/ 0.58 (95% CI: 0.39 - 0.75) | 0.35 (95% CI: 0.16 - 0.76)/ 1.47 (95% CI: 1.07 - 2.02) | 0.38 (95% CI: 0.18 - 0.62)/ 0.28 (95% CI: 0.18 - 0.41) | Pretest=64%<br>Posttest=38.3% | Pretest=64%<br>Posttest=72.3% | 30.59%<br>(21.05% - 41.53%) |
| <b>Bilateral Resisted Hip Adduction</b> | 0.09 (95% CI: 0.03 - 0.20)/ 0.81 (95% CI: 0.63 - 0.93) | 0.47 (95% CI: 0.16 - 1.41)/ 1.13 (95% CI: 0.93 - 1.37) | 0.45 (95% CI: 0.17 - 0.77)/ 0.33 (95% CI: 0.23 - 0.45) | Pretest=64%<br>Posttest=45.5% | Pretest=64%<br>Posttest=66.8% | 30.59%<br>(21.05% - 41.53%) |
| <b>Resisted External Derotation</b>     | 0.30 (95% CI: 0.19 - 0.44)/ 0.58 (95% CI: 0.39 - 0.75) | 0.72 (95% CI: 0.41 - 1.28)/ 1.20 (95% CI: 0.85 - 1.69) | 0.57 (95% CI: 0.37 - 0.75)/ 0.32 (95% CI: 0.20 - 0.45) | Pretest=64%<br>Posttest=56.1% | Pretest=64%<br>Posttest=68.1% | 40.23%<br>(29.85% - 51.29%) |
| <b>FADIR</b>                            | 0.91 (95% CI: 0.80 - 0.97)/ 0.32 (95% CI: 0.17 - 0.51) | 1.34 (95% CI: 1.04 - 1.74)/ 0.28 (95% CI: 0.10 - 0.74) | 0.71 (95% CI: 0.59 - 0.81)/ 0.67 (95% CI: 0.38 - 0.88) | Pretest=64%<br>Posttest=71%   | Pretest=64%<br>Posttest=34%   | 70.11%<br>(59.35% - 79.46%) |

|                                            |                                                        |                                                        |                                                        |                               |                               |                             |
|--------------------------------------------|--------------------------------------------------------|--------------------------------------------------------|--------------------------------------------------------|-------------------------------|-------------------------------|-----------------------------|
| <b>Thomas Test</b>                         | 0.20 (95% CI: 0.10 - 0.35)/ 0.83 (95% CI: 0.64 - 0.94) | 1.19 (95% CI: 0.44 - 3.19)/ 0.96 (95% CI: 0.77 - 1.20) | 0.64 (95% CI: 0.35 - 0.87)/ 0.41 (95% CI: 0.28 - 0.54) | Pretest=60%<br>Posttest=64.1% | Pretest=60%<br>Posttest=59%   | 45.21%<br>(33.52% - 57.30%) |
| <b>Log Roll</b>                            | 0.05 (95% CI: 0.01 - 0.15)/ 0.87 (95% CI: 0.69 - 0.96) | 0.40 (95% CI: 0.10 - 1.68)/ 1.09 (95% CI: 0.94 - 1.27) | 0.43 (95% CI: 0.10 - 0.82)/ 0.33 (95% CI: 0.23 - 0.44) | Pretest=65%<br>Posttest=42.6% | Pretest=65%<br>Posttest=66.9% | 33.72%<br>(23.88% - 44.72%) |
| <b>Palpation of Trochanter</b>             | 0.33 (95% CI: 0.21 - 0.47)/ 0.57 (95% CI: 0.37 - 0.76) | 0.78 (95% CI: 0.44 - 1.38)/ 1.17 (95% CI: 0.80 - 1.69) | 0.60 (95% CI: 0.41 - 0.77)/ 0.31 (95% CI: 0.19 - 0.45) | Pretest=66%<br>Posttest=60.2% | Pretest=66%<br>Posttest=69.4% | 41.46%<br>(30.68% - 52.88%) |
| <b>Self Administered Examination (SAE)</b> |                                                        |                                                        |                                                        |                               |                               | <b>Accuracy</b>             |
| <b>Clicking or Catching</b>                | 0.45 (95% CI: 0.30 - 0.61)/ 0.46 (95% CI: 0.28 - 0.66) | 0.84 (95% CI: 0.52 - 1.4)/ 1.18 (95% CI: 0.73 - 1.91)  | 0.56 (95% CI: 0.38 - 0.73)/ 0.36 (95% CI: 0.21 - 0.54) | Pretest=60%<br>Posttest=55.8% | Pretest=60%<br>Posttest=63.9% | 45.71%<br>(33.74% - 58.06%) |
| <b>Catching only</b>                       | 0.40 (95% CI: 0.25 - 0.57)/ 0.68 (95% CI: 0.25 - 0.68) | 1.24 (95% CI: 0.64 - 2.4)/ 0.88 (95% CI: 0.64 - 0.88)  | 0.64 (95% CI: 0.43 - 0.82)/                            | Pretest=59%<br>Posttest=64.1% | Pretest=59%<br>Posttest=55.9% | 51.47<br>(39.03% - 63.78)%  |

|                                                   |                                                        |                                                        |                                                        |                               |                               |                             |
|---------------------------------------------------|--------------------------------------------------------|--------------------------------------------------------|--------------------------------------------------------|-------------------------------|-------------------------------|-----------------------------|
|                                                   | 0.48 - 0.84)                                           | 0.62 – 1.27)                                           | 0.44 (95% CI: 0.29 - 0.60)                             |                               |                               |                             |
| <b>Clicking only</b>                              | 0.28 (95% CI: 0.15 - 0.44)/ 0.62 (95% CI: 0.48 - 0.86) | 0.73 (95% CI: 0.37 – 1.44)/ 1.17 (95% CI: 0.83 – 1.65) | 0.50 (95% CI: 0.28 - 0.72)/ 0.38 (95% CI: 0.25 - 0.54) | Pretest=58%<br>Posttest=50.2% | Pretest=58%<br>Posttest=61.8% | 41.18%<br>(29.37% - 53.77%) |
| <b>Anterior/Groin/Hip Pain</b>                    | 0.25 (95% CI: 0.12 - 0.42)/ 0.69 (95% CI: 0.48 - 0.86) | 0.81 (95% CI: 0.36 – 1.82)/ 1.08 (95% CI: 0.79 – 1.49) | 0.53 (95% CI: 0.28 - 0.77)/ 0.40 (95% CI: 0.26 - 0.56) | Pretest=58%<br>Posttest=52.8% | Pretest=58%<br>Posttest=60%   | 43.55%<br>(30.99% - 56.74%) |
| <b>Pain with Palpation Lateral Hip</b>            | 0.64 (95% CI: 0.50 - 0.77)/ 0.65 (95% CI: 0.45 - 0.81) | 1.81 (95% CI: 1.08 - 3.03)/ 0.55 (95% CI: 0.36 - 0.86) | 0.77 (95% CI: 0.62 - 0.88)/ 0.50 (95% CI: 0.34 - 0.66) | Pretest=64%<br>Posttest=76.3% | Pretest=64%<br>Posttest=49.3% | 64.37%<br>(53.38% - 74.35%) |
| <b>Active Hip Flexion (In-line with Shoulder)</b> | 0.70 (95% CI: 0.56 - 0.81)/ 0.48 (95% CI: 0.30 - 0.67) | 1.35 (95% CI: 0.92 - 1.98)/ 0.63 (95% CI: 0.37 - 1.07) | 0.71 (95% CI: 0.57 - 0.82)/ 0.47 (95% CI: 0.29 - 0.65) | Pretest=64%<br>Posttest=70.6% | Pretest=64%<br>Posttest=52.8% | 62.07%<br>(51.03% - 72.26%) |
| <b>Active Hip Flexion (Outside Shoulders)</b>     | 0.68 (95% CI: 0.52 - 0.81)/ 0.55 (95% CI: 0.30 - 0.67) | 1.51 (95% CI: 0.97 – 2.34)/ 0.85 (95% CI: 0.30 - 0.67) | 0.68 (95% CI: 0.52 - 0.81)/                            | Pretest=64%<br>Posttest=67.9% | Pretest=64%<br>Posttest=61%   | 54.02%<br>(43.00% - 64.77%) |

|                                                          |                                                        |                                                        |                                                        |                               |                               |                             |
|----------------------------------------------------------|--------------------------------------------------------|--------------------------------------------------------|--------------------------------------------------------|-------------------------------|-------------------------------|-----------------------------|
|                                                          | 0.36 - 0.73)                                           | 0.55 - 1.30)                                           | 0.55 (95% CI: 0.42 - 0.68)                             |                               |                               |                             |
| <b>FABER (Restricted)</b>                                | 0.64 (95% CI: 0.50 - 0.77)/ 0.23 (95% CI: 0.10 - 0.41) | 0.83 (95% CI: 0.63 - 1.09)/ 1.58 (95% CI: 0.75 - 3.32) | 0.60 (95% CI: 0.47 - 0.72)/ 0.26 (95% CI: 0.11 - 0.46) | Pretest=64%<br>Posttest=59.6% | Pretest=64%<br>Posttest=74%   | 49.43%<br>(38.53% - 60.36%) |
| <b>FABER (Restricted Greater than Contralateral Leg)</b> | 0.53 (95% CI: 0.38 - 0.68)/ 0.21 (95% CI: 0.08 - 0.40) | 0.67 (95% CI: 0.48 - 0.94)/ 2.26 (95% CI: 1.04 - 4.91) | 0.51 (95% CI: 0.36 - 0.66)/ 0.22 (95% CI: 0.09 - 0.42) | Pretest=61%<br>Posttest=51.2% | Pretest=61%<br>Posttest=77.9% | 40.54%<br>(29.27% - 52.59%) |
| <b>FABER (Painful)</b>                                   | 0.66 (95% CI: 0.52 - 0.78)/ 0.39 (95% CI: 0.22 - 0.58) | 1.08 (95% CI: 0.77 - 1.51)/ 0.88 (95% CI: 0.49 - 1.56) | 0.66 (95% CI: 0.52 - 0.78)/ 0.39 (95% CI: 0.22 - 0.58) | Pretest=64%<br>Posttest=65.7% | Pretest=64%<br>Posttest=61%   | 56.32%<br>(45.26% - 66.94%) |
| <b>Bent Knee Fall-Out</b>                                | 0.62 (95% CI: 0.46 - 0.65)/ 0.32 (95% CI: 0.19 - 0.49) | 0.91 (95% CI: 0.67 - 1.32)/ 1.18 (95% CI: 0.70 - 1.89) | 0.52 (95% CI: 0.44 - 0.60)/ 0.42 (95% CI: 0.29 - 0.56) | Pretest=54%<br>Posttest=52%   | Pretest=54%<br>Posttest=58%   | 48.28%<br>(37.42% - 59.25%) |
| <b>Pain during Sitting</b>                               | 0.38 (95% CI: 0.25 - 0.51)/ 0.68 (95% CI:              | 1.16 (95% CI: 0.63 - 2.14)/ 0.92 (95% CI:              | 0.68 (95% CI: 0.49 - 0.83)/                            | Pretest=64%<br>Posttest=68%   | Pretest=64%<br>Posttest=62.1% | 48.28%<br>(37.42% - 59.25%) |

|                                                          |                                                        |                                                        |                                                        |                               |                               |                             |
|----------------------------------------------------------|--------------------------------------------------------|--------------------------------------------------------|--------------------------------------------------------|-------------------------------|-------------------------------|-----------------------------|
|                                                          | 0.49 - 0.83)                                           | 0.67 - 1.27)                                           | 0.38 (95% CI: 0.25 - 0.51)                             |                               |                               |                             |
| <b>Pain during either IR or ER Range-of-Motion</b>       | 0.47 (95% CI: 0.34 - 0.61)/ 0.65 (95% CI: 0.45 - 0.81) | 1.33 (95% CI: 0.77 - 2.31)/ 0.82 (95% CI: 0.57 - 1.17) | 0.70 (95% CI: 0.53 - 0.84)/ 0.41 (95% CI: 0.27 - 0.56) | Pretest=64%<br>Posttest=70.3% | Pretest=64%<br>Posttest=59.3% | 53.49%<br>(42.41% - 64.32%) |
| <b>Pain at End Range-of-Motion (IR or ER)</b>            | 0.62 (95% CI: 0.47 - 0.75)/ 0.37 (95% CI: 0.19 - 0.58) | 0.98 (95% CI: 0.69 - 1.41)/ 1.03 (95% CI: 0.56 - 1.88) | 0.65 (95% CI: 0.49 - 0.78)/ 0.34 (95% CI: 0.18 - 0.54) | Pretest=65%<br>Posttest=64.5% | Pretest=65%<br>Posttest=65.7% | 53.25%<br>(41.52% - 64.71%) |
| <b>Able to Perform Resisted Hip Adduction in Sitting</b> | #/0.03 (95% CI: 0.00 - 0.17)                           | 1.03 (95% CI: 0.97 - 1.10)/#                           | 0.97 (95% CI: 0.83 - 1.00)/#                           | Pretest=64%<br>Posttest=65%   | Pretest=64%<br>Posttest=0%    | 65.52%<br>(54.56% - 75.39%) |
| <b>Pain with Resisted Hip Adduction in Sitting</b>       | 0.20 (95% CI: 0.10 - 0.32)/ 0.84 (95% CI: 0.66 - 0.95) | 1.22 (95% CI: 0.47 - 3.19)/ 0.96 (95% CI: 0.78 - 1.17) | 0.69 (95% CI: 0.41 - 0.89)/ 0.37 (95% CI: 0.25 - 0.49) | Pretest=64%<br>Posttest=68.4% | Pretest=64%<br>Posttest=63.1% | 42.53%<br>(31.99% - 53.59%) |
| <b>Able to Perform Resisted Hip Abduction in Sitting</b> | 1.00 (95% CI: 0.98 - 1.00)/0.03                        | 1.03 (95% CI: 0.98 - 1.03)/ 0.00 (95% CI: 0.98 - 1.03) | 0.65 (95% CI: 0.64 - 0.65)/ 1.00 (95% CI: 0.21 - 1.00) | Pretest=64%<br>Posttest=64.6% | Pretest=64%<br>Posttest=0%    | 65.52%<br>(54.56% - 75.39%) |

|                                                    |                                                                       |                                                                       |                                                                 |                               |                               |                                |
|----------------------------------------------------|-----------------------------------------------------------------------|-----------------------------------------------------------------------|-----------------------------------------------------------------|-------------------------------|-------------------------------|--------------------------------|
|                                                    | (95%CI:<br>0.00 - .03)                                                | 0.00 –<br>9.56)                                                       |                                                                 |                               |                               |                                |
| <b>Pain with Resisted Hip Abduction in Sitting</b> | 0.14 (95%<br>CI: 0.06 -<br>0.26)/ 0.94<br>(95% CI:<br>0.79 -<br>0.99) | 2.21 (95%<br>CI: 0.50 -<br>9.79)/ 0.92<br>(95% CI:<br>0.80 -<br>1.06) | 0.80 (95% CI:<br>0.44 - 0.97)/<br>0.38 (95% CI:<br>0.27 - 0.49) | Pretest=64%<br>Posttest=79.7% | Pretest=64%<br>Posttest=62.1% | 42.53%<br>(31.99% -<br>53.59%) |
| <b>Able to Perform Single Leg Stance</b>           | 0.98 (95%<br>CI: 0.90 -<br>1.00)/ 0.03<br>(95% CI:<br>0.00 -<br>0.17) | 1.02 (95%<br>CI: 0.94 -<br>1.10)/ 0.54<br>(95% CI:<br>0.03 -<br>8.26) | 0.65 (95% CI:<br>0.54 - 0.76)/<br>0.50 (95% CI:<br>0.01 - 0.99) | Pretest=65%<br>Posttest=65.4% | Pretest=65%<br>Posttest=50.1% | 65.12%<br>(54.08% -<br>75.08%) |
| <b>Pain during Single Leg Stance</b>               | 0.34 (95%<br>CI: 0.22 -<br>0.48)/ 0.67<br>(95% CI:<br>0.47 -<br>0.83) | 1.02 (95%<br>CI: 0.55 -<br>1.90)/ 0.99<br>(95% CI:<br>0.72 -<br>1.36) | 0.66 (95% CI:<br>0.46 - 0.82)/<br>0.35 (95% CI:<br>0.23 - 0.49) | Pretest=65%<br>Posttest=65.4% | Pretest=65%<br>Posttest=64.8% | 45.35%<br>(34.58% -<br>56.45%) |
| <b>Able to Perform Single Leg Squat</b>            | 0.96 (95%<br>CI: 0.88 -<br>1.00)/ 0.10<br>(95% CI:<br>0.02 -<br>0.26) | 1.07 (95%<br>CI: 0.94 -<br>1.21)/ 0.37<br>(95% CI:<br>0.07 -<br>2.09) | 0.66 (95% CI:<br>0.55 - 0.76)/<br>0.60 (95% CI:<br>0.15 - 0.95) | Pretest=64%<br>Posttest=65.5% | Pretest=64%<br>Posttest=39.7% | 65.52%<br>(54.56% -<br>75.39%) |
| <b>Pain during Single Leg Squat</b>                | 0.48 (95%<br>CI: 0.35 -<br>0.62)/ 0.52<br>(95% CI:<br>0.35 -<br>0.62) | 1.00 (95%<br>CI: 0.63 -<br>1.57)/ 1.00<br>(95% CI:<br>0.63 -<br>1.57) | 0.64 (95% CI:<br>0.48 - 0.78)/                                  | Pretest=64%<br>Posttest=64%   | Pretest=64%<br>Posttest=64%   | 49.43%<br>(38.53% -<br>60.36%) |

|                                    |                                                        |                                                        |                                                        |                               |                               |                             |
|------------------------------------|--------------------------------------------------------|--------------------------------------------------------|--------------------------------------------------------|-------------------------------|-------------------------------|-----------------------------|
|                                    | 0.33 - 0.70)                                           | 0.66 - 1.53)                                           | 0.36 (95% CI: 0.22 - 0.51)                             |                               |                               |                             |
| <b>Able to Perform 3 Way Squat</b> | 1.00 (95% CI: 1.00 - 1.00)/ 0.00 (95% CI: 0.00 - 0.00) | 1.00 (95% CI: 1.00 - 1.00)/ NaN (95% CI: NaN - NaN)    | 0.64 (95% CI: 0.64, 0.64)/ 0.10 (95% CI: 0.10 - 0.10)  | Pretest=64%<br>Posttest=64%   | Pretest=64%<br>Posttest=NaN%  | 64.37%<br>(53.38% - 74.35%) |
| <b>Pain during 3 Way Squat</b>     | 0.41 (95% CI: 0.28 - 0.55)/ 0.74 (95% CI: 0.55 - 0.88) | 1.59 (95% CI: 0.81 - 3.12)/ 0.79 (95% CI: 0.59 - 1.07) | 0.74 (95% CI: 0.55 - 0.88)/ 0.41 (95% CI: 0.28 - 0.55) | Pretest=64%<br>Posttest=74%   | Pretest=64%<br>Posttest=58.4% | 52.87%<br>(41.87%-63.67%)   |
| <b>Able to Perform Sumo Squat</b>  | 0.98 (95% CI: 0.98 - 0.99)/ 0.00 (95% CI: 0.00 - 0.03) | 0.98 (95% CI: 0.98 - 1.03)/ Inf (95% CI: 0.03 - Inf)   | 0.64 (95% CI: 0.64 - 0.65)/ 0.09 (95% CI: 0.05 - 0.18) | Pretest=64%<br>Posttest=63%   | Pretest=64%<br>Posttest=NaN%  | 63.22%<br>(52.20% - 73.31%) |
| <b>Pain with Sumo Squat</b>        | 0.57 (95% CI: 0.43 - 0.70)/ 0.52 (95% CI: 0.33 - 0.70) | 1.18 (95% CI: 0.77 - 1.81)/ 0.83 (95% CI: 0.53 - 1.31) | 0.68 (95% CI: 0.53 - 0.81)/ 0.40 (95% CI: 0.25 - 0.57) | Pretest=64%<br>Posttest=67.7% | Pretest=64%<br>Posttest=59.6% | 55.17%<br>(44.13% - 65.85%) |



|                                          |                                                                       |                                                                       |                                                                 |                               |                               |                                |
|------------------------------------------|-----------------------------------------------------------------------|-----------------------------------------------------------------------|-----------------------------------------------------------------|-------------------------------|-------------------------------|--------------------------------|
| <b>Able to Perform Valgus Knee Squat</b> | 1.00<br>(95%CI:<br>0.98 –<br>1.00)/0.03<br>(95%CI:<br>0.00 - .03)     | 1.03 (95%<br>CI: 0.98 –<br>1.03)/ 0.00<br>(95% CI:<br>0.00 –<br>9.56) | 0.65 (95% CI:<br>0.64 - 0.65)/<br>1.00 (95% CI:<br>0.21 – 1.00) | Pretest=64%<br>Posttest=65%   | Pretest=64%<br>Posttest=0%    | 65.52%<br>(54.56%-<br>75.39%)  |
| <b>Pain with Valgus Knee Squat</b>       | 0.43 (95%<br>CI: 0.30 -<br>0.57)/ 0.77<br>(95% CI:<br>0.59 -<br>0.90) | 1.90 (95%<br>CI: 0.93 -<br>3.89)/ 0.74<br>(95% CI:<br>0.55 -<br>0.99) | 0.77 (95% CI:<br>0.59 - 0.90)/<br>0.43 (95% CI:<br>0.30 - 0.57) | Pretest=64%<br>Posttest=77.2% | Pretest=64%<br>Posttest=56.8% | 55.17%<br>(44.13% -<br>65.85%) |

Results of diagnostic analysis for individual tests. SN = Sensitivity; SP = Specificity; +LR =Positive Likelihood Ratio; -LR = Negative Likelihood Ratio; PPV = Positive Predictive Value; NPV = Negative Predictive Value; CI = 95% Confidence Interval; NaN = Unable to calculate; Inf = Infinite
